# Supplementary material for: RNAi Suppression of Hormone Receptor HR3 Blocks Larval Molting and Metamorphosis in the Cigarette Beetle, Lasioderma serricorne
Source: MDPI journal article supplement (doi:10.3390/agriculture12081257), 2022-08-18
Supplement: s1 [file s1]

**Table S1. Primer sequences used in this study.**

| Experiments      | Gene              | Forward sequence (5'-3')                         | Reverse sequence (5'-3')                         |
|------------------|-------------------|--------------------------------------------------|--------------------------------------------------|
| ORF confirmation | <i>LsHR3</i>      | TGTTTAACGCTAGTGGTGGG                             | TAAGTCTGCCGATTTACCG                              |
| qPCR analysis    | <i>LsHR3</i>      | ACAAGAATATGGCCCACGAG                             | TCGCCGTAGAGGACGTAGTT                             |
|                  | <i>LsCYP302a1</i> | GAGCAGTTCGAAAGGGGTTG                             | GCTGCGGACCATTATCTGTG                             |
|                  | <i>LsCYP306a1</i> | TGGTTGCATTGAAGAGACGG                             | GGCAAGAAACCTTCCGACTT                             |
|                  | <i>LsCYP307a1</i> | GACAAAGTCGCAATGCCGTA                             | CGGTTTCGTCCCAGTAATCCT                            |
|                  | <i>LsCYP314a1</i> | GTGCTGACGATGCTGTTAGG                             | GCACACAACCATTAGCACCA                             |
|                  | <i>LsCYP315a1</i> | GAGGAAGCCGTCGATAATGC                             | CGCAGCTATCACAAGGTCTG                             |
|                  | <i>LsTRE1</i>     | CCTACGGACCAAGACCTGAA                             | TTTGTTGGTTGCGTTGGTAA                             |
|                  | <i>LsTRE2</i>     | GGTCAGTTGGCGGTTTATGG                             | TACTGGATGAAACCCACCCC                             |
|                  | <i>LsUAP1</i>     | GGCAACACTGATCCATCCTT                             | GGCACTCTGCACGATTATGA                             |
|                  | <i>LsCHS1</i>     | ATTTACCTCGCACCAACAC                              | CAGTCTTCACATCCGCTTCG                             |
|                  | <i>LsCHT5</i>     | TGAGCAGCAAGTTCCGTATG                             | AAGGTGAACGGCTACCATTG                             |
|                  | <i>LsCHT7</i>     | CGTCTTCCGCATGAACCAAT                             | CCTCTCCCTCGAAAGCCAAT                             |
|                  | <i>LsCHT10</i>    | CCTCGTGGGTTTCGAGAATTA                            | CGTCTTCCGGATGTAGGAAA                             |
|                  | <i>LsCDA1</i>     | GCTTTCTTGTTTTGGGTGGA                             | CGAGGTCAATTTGCAGGAAT                             |
|                  | <i>LsNAG1</i>     | CTCAAACGGACAGACTGCAA                             | AGTTCTGAGCGGCAAACAGT                             |
|                  | <i>LsNAG2</i>     | CCCAACGACAGAGGTGTTTT                             | CCTCTCGCGATCAGTCTTTC                             |
| dsRNA synthesis  | <i>LsHR3</i>      | <b>TAATACGACTCACTATAGGGTGGTCAACTATCAGTGTC</b> CC | <b>TAATACGACTCACTATAGGGCTGACTGACCCGCTTAAAGC</b>  |
|                  | <i>LsCYP302a1</i> | <b>TAATACGACTCACTATAGGGCGTCTGTGTTATT</b> CAGAC   | <b>TAATACGACTCACTATAGGGCGGTTTCAGTTCTTTCTCTG</b>  |
|                  | <i>LsCYP306a1</i> | <b>TAATACGACTCACTATAGGGGGGAAGTCTAACAGCTATCG</b>  | <b>TAATACGACTCACTATAGGGGGATTACGTTTCCGGTTGA</b>   |
|                  | <i>LsCYP307a1</i> | <b>TAATACGACTCACTATAGGGGATATACGGGGACATATT</b> CG | <b>TAATACGACTCACTATAGGGGTGTTTTGTTCTCGGAGTTT</b>  |
|                  | <i>LsCYP314a1</i> | <b>TAATACGACTCACTATAGGGGCGGTTGTTAAGAGTGAAG</b>   | <b>TAATACGACTCACTATAGGGTTCGGTACCAACAAGA</b> ACTC |
|                  | <i>LsCYP315a1</i> | <b>TAATACGACTCACTATAGGGCAAAATTGGGCCGATCAGTG</b>  | <b>TAATACGACTCACTATAGGGATGCATTATCGACGGCTTCC</b>  |
|                  | <i>LsEcR</i>      | <b>TAATACGACTCACTATAGGGAGGAATTATGCCTCGTCTGC</b>  | <b>TAATACGACTCACTATAGGGTAGTCGATGTATGAGTTCT</b>   |
|                  | <i>LsUSP</i>      | <b>TAATACGACTCACTATAGGGCCAGCGCAAACACTACGGA</b>   | <b>TAATACGACTCACTATAGGGTCCATCGAACGATGAGAGAA</b>  |

The bold letters represent the T7 promoter sequences for *in vitro* transcription in dsRNA synthesis.
